# Supplementary material for: Interfacial rheology and direct imaging reveal domain-templated network formation in phospholipid monolayers penetrated by fibrinogen
Source: Royal Society of Chemistry journal article supplement (doi:10.1039/c9sm01519a), 2019-01-01
Supplement: c9sm01519a1.pdf [file c9sm01519a1.pdf]

Supplementary Material for “Interfacial rheology and direct imaging reveal domain-templated network formation in phospholipid monolayers penetrated by fibrinogen”  
Ian Williams, Joseph A. Zasadzinski and Todd M. Squires

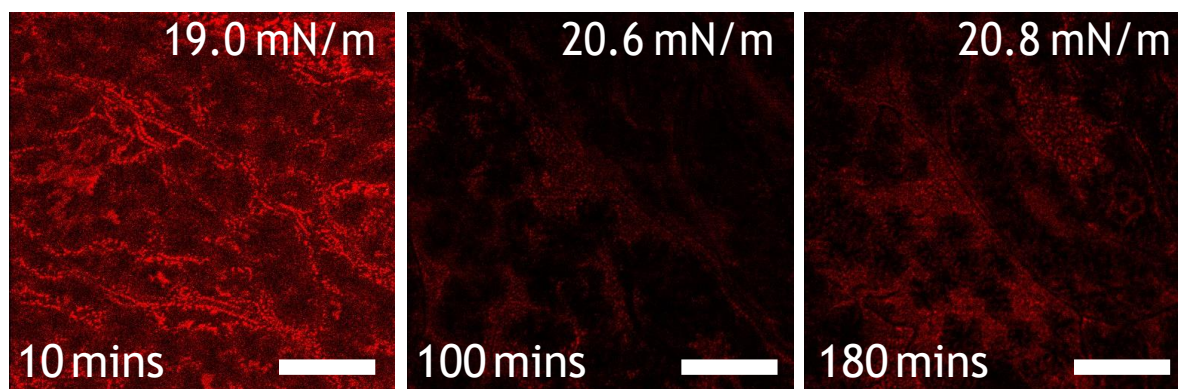

**Supplementary Figure S1.** Confocal micrographs of monolayer after fibrinogen solution is injected into the subphase beneath a DPPC monolayer at initial surface pressure  $\pi_i = 15 \text{ mN/m}$  showing labelled fibrinogen. Fibrinogen is injected at  $t = 0$ . Micrographs acquired 10 minutes, 100 minutes and 180 minutes after fibrinogen injection. Scale bar represents  $50 \mu\text{m}$ .
